# Supplementary material for: Elevated CD39+T-Regulatory Cells and Reduced Levels of Adenosine Indicate a Role for Tolerogenic Signals in the Progression from Moderate to Severe COVID-19
Source: MDPI journal article supplement (doi:10.3390/ijms242417614), 2023-12-18
Supplement: s1 [file s1]

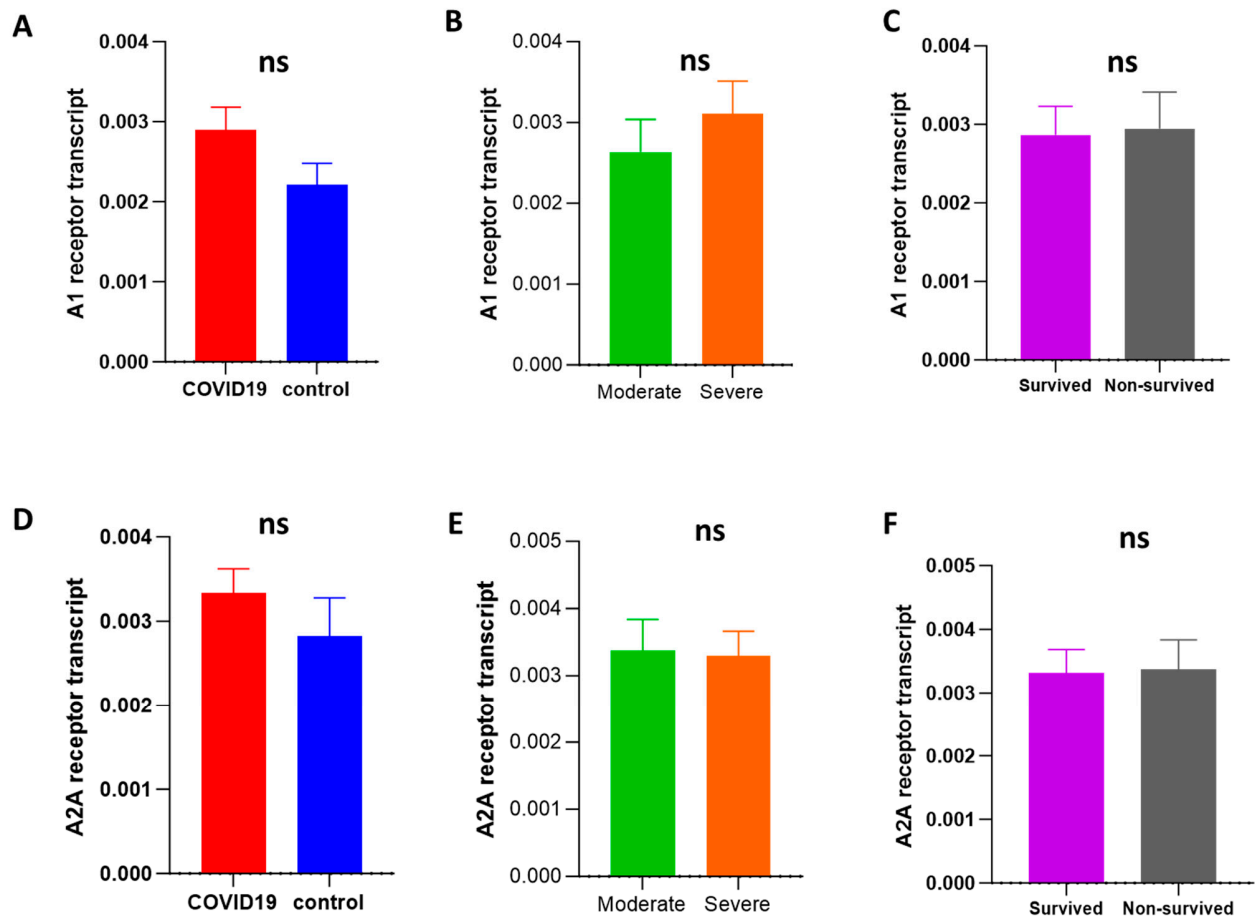

**Supple Figure S1:** Transcriptome expression of adenosine receptors A1 and A2A. (A, D) The transcript level of A1 and A2A receptors, respectively among COVID-19 and controls. (B, E) The transcript level of A1 and A2A receptors, respectively among severe COVID-19 and moderate COVID-19 patients. (C,F) The transcript level of A1 and A2A receptors, respectively among COVID-19 patients who survived and others are non-survived.

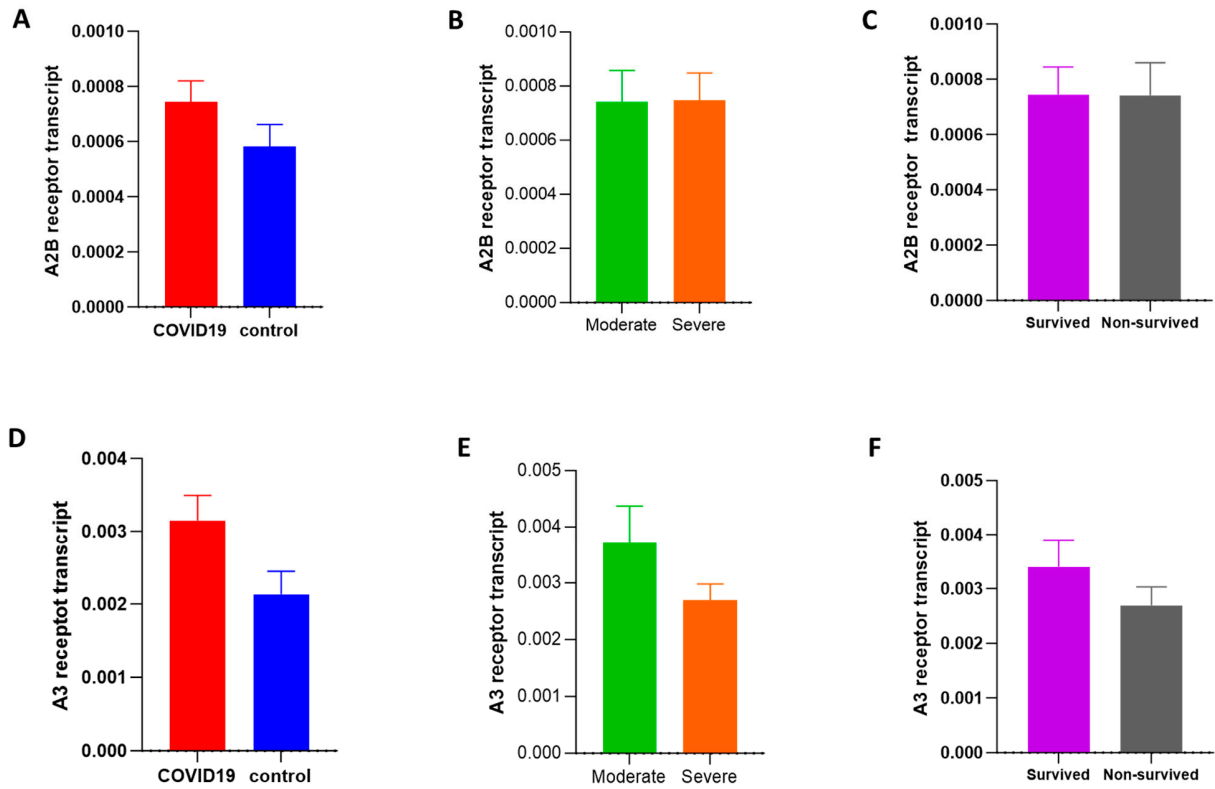

**Supple Figure S2:** Transcriptome expression of adenosine receptors A2B and A3. (A, D) The transcript level of A2B and A3 receptors, respectively among COVID-19 and controls. (B, E) The transcript level of A2B and A3 receptors, respectively among severe COVID-19 and moderate COVID-19 patients. (C,F) The transcript level of A2B and A3 receptors, respectively among COVID-19 patients who survived and others are non-survived.
